# Supplementary material
Source: publisher site journal article supplement (https://www.spandidos-publications.com/2146/downloadSupplementary)
Supplement: Supplementary file 1 [file downloadSupplementary]

## Sheet: turquoise_gene_GO
Table SIII. Go term and KEGG pathway of brown module
ID	Description	GeneRatio	BgRatio	pvalue	p.adjust	qvalue	geneID	Count
GO:0004984	olfactory receptor activity	340/6686	427/17697	1.37238e-71	1.63725e-68	1.53129e-68	OR10A3/OR10A4/OR10A6/OR10A7/OR10AD1/OR10AG1/OR10C1/OR10G2/OR10G3/OR10G4/OR10G7/OR10G8/OR10G9/OR10H1/OR10H3/OR10H4/OR10H5/OR10J1/OR10J5/OR10K1/OR10K2/OR10P1/OR10Q1/OR10R2/OR10S1/OR10T2/OR10V1/OR10W1/OR10X1/OR10Z1/OR11A1/OR11G2/OR11H1/OR11H12/OR11H2/OR11H4/OR11H6/OR11L1/OR12D2/OR12D3/OR13A1/OR13C2/OR13C3/OR13C4/OR13C5/OR13C8/OR13C9/OR13D1/OR13F1/OR13G1/OR13H1/OR13J1/OR14A16/OR14C36/OR14I1/OR14J1/OR…	340
GO:0005549	odorant binding	81/6686	102/17697	8.34161e-18	4.97577e-15	4.65374e-15	OR10Q1/OR10V1/OR10W1/OR11L1/OR13A1/OR14A16/OR14C36/OR14I1/OR14J1/OR2C1/OR5A1/OR5A2/OR5AC2/OR5AK2/OR5AN1/OR5AP2/OR5AR1/OR5AU1/OR5B17/OR5B2/OR5B3/OR5C1/OR5D13/OR5D14/OR5D16/OR5D18/OR5F1/OR5H1/OR5H14/OR5H15/OR5H2/OR5H6/OR5I1/OR5J2/OR5K1/OR5K2/OR5K3/OR5K4/OR5L1/OR5L2/OR5M1/OR5M10/OR5M11/OR5M3/OR5M8/OR5M9/OR5P2/OR5P3/OR5R1/OR6B2/OR6B3/OR8A1/OR8B12/OR8B2/OR8B3/OR8B4/OR8B8/OR8D1/OR8D2/OR8D4/OR8G1/OR8G5/…	81
GO:0030594	neurotransmitter receptor activity	85/6686	117/17697	1.67911e-14	6.67725e-12	6.2451e-12	ADORA1/CHRFAM7A/CHRM1/CHRM2/CHRM3/CHRM4/CHRM5/CHRNA1/CHRNA10/CHRNA2/CHRNA3/CHRNA4/CHRNA5/CHRNA7/CHRNA9/CHRNB1/CHRNB2/CHRNB4/CHRND/CHRNG/DRD2/DRD3/DRD4/DRD5/GABRA1/GABRA2/GABRA4/GABRA5/GABRA6/GABRB1/GABRB2/GABRB3/GABRD/GABRE/GABRG1/GABRG2/GABRR1/GLRA1/GLRA2/GLRA4/GLRB/GPR156/GRIA1/GRIA2/GRIA4/GRID2/GRIK1/GRIK3/GRIN1/GRIN2A/GRIN2B/GRIN2C/GRIN2D/GRIN3B/GRM1/HRH3/HTR1A/HTR1B/HTR1D/HTR1E/HTR2A/HTR2C/H…	85
GO:0005261	cation channel activity	179/6686	319/17697	1.64008e-11	4.89154e-09	4.57497e-09	ABCC8/ABCC9/CACHD1/CACNA1A/CACNA1B/CACNA1E/CACNA1F/CACNA1G/CACNA1H/CACNA1I/CACNA1S/CACNA2D2/CACNA2D4/CACNB2/CACNG1/CACNG2/CACNG3/CACNG4/CACNG5/CACNG6/CACNG7/CALHM1/CATSPER2/CATSPER3/CATSPER4/CDK5/CHRNA1/CHRNA10/CHRNA2/CHRNA3/CHRNA4/CHRNA5/CHRNA7/CHRNA9/CHRNB1/CHRNB2/CHRNB4/CHRND/CHRNG/CNGA2/CNGA3/CNGA4/CNGB1/CNGB3/CNR1/CUL5/FAM155A/FXYD4/GPM6A/GRIA1/GRIA2/GRIA4/GRIK1/GRIK3/GRIN1/GRIN2A/GRIN2B/GRI…	179
GO:0046873	metal ion transmembrane transporter activity	232/6686	438/17697	4.60086e-11	9.65141e-09	9.02677e-09	ABCC8/ABCC9/ATP1A2/ATP1A3/ATP1B3/ATP2A1/ATP2B2/ATP2B3/ATP2B4/ATP2C1/ATP2C2/ATP4A/ATP7B/CACHD1/CACNA1A/CACNA1B/CACNA1E/CACNA1F/CACNA1G/CACNA1H/CACNA1I/CACNA1S/CACNA2D2/CACNA2D4/CACNB2/CACNG1/CACNG2/CACNG3/CACNG4/CACNG5/CACNG6/CACNG7/CALHM1/CATSPER2/CATSPER3/CATSPER4/CDK5/CHRNA10/CHRNA7/CHRNA9/CLDN16/CNNM2/CNNM4/CNR1/CUL5/FAM155A/FXYD2/FXYD4/GPM6A/GRIK1/GRIK3/GRIN1/GRIN2A/GRIN2B/GRIN2C/GRIN2D/GRIN3…	232
GO:0015267	channel activity	240/6686	456/17697	4.88249e-11	9.65141e-09	9.02677e-09	ABCC8/ABCC9/ANO5/AQP10/AQP12B/AQP2/AQP6/AQP7/AQP8/BAX/BCL2/BEST3/BEST4/CACHD1/CACNA1A/CACNA1B/CACNA1E/CACNA1F/CACNA1G/CACNA1H/CACNA1I/CACNA1S/CACNA2D2/CACNA2D4/CACNB2/CACNG1/CACNG2/CACNG3/CACNG4/CACNG5/CACNG6/CACNG7/CALHM1/CATSPER2/CATSPER3/CATSPER4/CDK5/CFTR/CHRFAM7A/CHRNA1/CHRNA10/CHRNA2/CHRNA3/CHRNA4/CHRNA5/CHRNA7/CHRNA9/CHRNB1/CHRNB2/CHRNB4/CHRND/CHRNG/CLCC1/CLCN1/CLCN3/CLDN4/CLIC5/CLIC6/CNGA…	240
GO:0022838	substrate-specific channel activity	227/6686	428/17697	6.32562e-11	9.65141e-09	9.02677e-09	ABCC8/ABCC9/ANO5/AQP10/AQP2/AQP6/AQP7/AQP8/BEST3/BEST4/CACHD1/CACNA1A/CACNA1B/CACNA1E/CACNA1F/CACNA1G/CACNA1H/CACNA1I/CACNA1S/CACNA2D2/CACNA2D4/CACNB2/CACNG1/CACNG2/CACNG3/CACNG4/CACNG5/CACNG6/CACNG7/CALHM1/CATSPER2/CATSPER3/CATSPER4/CDK5/CFTR/CHRFAM7A/CHRNA1/CHRNA10/CHRNA2/CHRNA3/CHRNA4/CHRNA5/CHRNA7/CHRNA9/CHRNB1/CHRNB2/CHRNB4/CHRND/CHRNG/CLCC1/CLCN1/CLCN3/CLDN4/CLIC5/CLIC6/CNGA2/CNGA3/CNGA4/CN…	227
GO:0022803	passive transmembrane transporter activity	240/6686	457/17697	6.47203e-11	9.65141e-09	9.02677e-09	ABCC8/ABCC9/ANO5/AQP10/AQP12B/AQP2/AQP6/AQP7/AQP8/BAX/BCL2/BEST3/BEST4/CACHD1/CACNA1A/CACNA1B/CACNA1E/CACNA1F/CACNA1G/CACNA1H/CACNA1I/CACNA1S/CACNA2D2/CACNA2D4/CACNB2/CACNG1/CACNG2/CACNG3/CACNG4/CACNG5/CACNG6/CACNG7/CALHM1/CATSPER2/CATSPER3/CATSPER4/CDK5/CFTR/CHRFAM7A/CHRNA1/CHRNA10/CHRNA2/CHRNA3/CHRNA4/CHRNA5/CHRNA7/CHRNA9/CHRNB1/CHRNB2/CHRNB4/CHRND/CHRNG/CLCC1/CLCN1/CLCN3/CLDN4/CLIC5/CLIC6/CNGA…	240
GO:0005216	ion channel activity	219/6686	416/17697	3.3304e-10	4.41463e-08	4.12892e-08	ABCC8/ABCC9/ANO5/BEST3/BEST4/CACHD1/CACNA1A/CACNA1B/CACNA1E/CACNA1F/CACNA1G/CACNA1H/CACNA1I/CACNA1S/CACNA2D2/CACNA2D4/CACNB2/CACNG1/CACNG2/CACNG3/CACNG4/CACNG5/CACNG6/CACNG7/CALHM1/CATSPER2/CATSPER3/CATSPER4/CDK5/CFTR/CHRFAM7A/CHRNA1/CHRNA10/CHRNA2/CHRNA3/CHRNA4/CHRNA5/CHRNA7/CHRNA9/CHRNB1/CHRNB2/CHRNB4/CHRND/CHRNG/CLCC1/CLCN1/CLCN3/CLDN4/CLIC5/CLIC6/CNGA2/CNGA3/CNGA4/CNGB1/CNGB3/CNR1/CUL5/FAM155…	219
GO:0022839	ion gated channel activity	181/6686	334/17697	5.95623e-10	7.10578e-08	6.6459e-08	ANO5/CACHD1/CACNA1A/CACNA1B/CACNA1E/CACNA1F/CACNA1G/CACNA1H/CACNA1I/CACNA1S/CACNA2D2/CACNA2D4/CACNB2/CACNG1/CACNG2/CACNG3/CACNG4/CACNG5/CACNG6/CACNG7/CALHM1/CATSPER2/CATSPER3/CATSPER4/CDK5/CFTR/CHRFAM7A/CHRNA1/CHRNA10/CHRNA2/CHRNA3/CHRNA4/CHRNA5/CHRNA7/CHRNA9/CHRNB1/CHRNB2/CHRNB4/CHRND/CHRNG/CLCN1/CLCN3/CLIC5/CLIC6/CNGA2/CNGA3/CNGA4/CNGB1/CNGB3/CNR1/CYBB/FAM155A/GABRA1/GABRA2/GABRA4/GABRA5/GABRA6…	181
GO:0022836	gated channel activity	184/6686	343/17697	1.25832e-09	1.3647e-07	1.27638e-07	ANO5/CACHD1/CACNA1A/CACNA1B/CACNA1E/CACNA1F/CACNA1G/CACNA1H/CACNA1I/CACNA1S/CACNA2D2/CACNA2D4/CACNB2/CACNG1/CACNG2/CACNG3/CACNG4/CACNG5/CACNG6/CACNG7/CALHM1/CATSPER2/CATSPER3/CATSPER4/CDK5/CFTR/CHRFAM7A/CHRNA1/CHRNA10/CHRNA2/CHRNA3/CHRNA4/CHRNA5/CHRNA7/CHRNA9/CHRNB1/CHRNB2/CHRNB4/CHRND/CHRNG/CLCN1/CLCN3/CLIC5/CLIC6/CNGA2/CNGA3/CNGA4/CNGB1/CNGB3/CNR1/CYBB/FAM155A/GABRA1/GABRA2/GABRA4/GABRA5/GABRA6…	184
GO:0005230	extracellular ligand-gated ion channel activity	54/6686	75/17697	1.76148e-09	1.73288e-07	1.62073e-07	CHRFAM7A/CHRNA1/CHRNA10/CHRNA2/CHRNA3/CHRNA4/CHRNA5/CHRNA7/CHRNA9/CHRNB1/CHRNB2/CHRNB4/CHRND/CHRNG/GABRA1/GABRA2/GABRA4/GABRA5/GABRA6/GABRB1/GABRB2/GABRB3/GABRD/GABRE/GABRG1/GABRG2/GABRQ/GABRR1/GABRR3/GLRA1/GLRA2/GLRA4/GLRB/GRIA1/GRIA2/GRIA4/GRID2/GRIK1/GRIK3/GRIN1/GRIN2A/GRIN2B/GRIN2C/GRIN2D/GRIN3B/HTR3A/HTR3B/HTR3D/HTR3E/P2RX1/P2RX2/P2RX3/P2RX6/SLC17A7	54
GO:0008227	G protein-coupled amine receptor activity	45/6686	59/17697	1.8883e-09	1.73288e-07	1.62073e-07	ADRA1A/ADRA1B/ADRA1D/ADRA2A/ADRA2B/ADRB3/CHRM1/CHRM2/CHRM3/CHRM4/CHRM5/DRD2/DRD3/DRD4/GPR101/HRH3/HTR1A/HTR1B/HTR1D/HTR1E/HTR2A/HTR2C/HTR4/HTR5A/HTR6/HTR7/OR10H1/OR10H3/OR10H4/OR10H5/OR10J5/OR11H4/OR13F1/OR56A1/OR56A4/OR5T1/OR5T2/OR5T3/OR6T1/TAAR1/TAAR2/TAAR5/TAAR6/TAAR8/TAAR9	45
GO:0022824	transmitter-gated ion channel activity	46/6686	61/17697	2.37682e-09	1.89037e-07	1.76802e-07	CHRNA1/CHRNA10/CHRNA2/CHRNA3/CHRNA4/CHRNA5/CHRNA7/CHRNA9/CHRNB1/CHRNB2/CHRNB4/CHRND/CHRNG/GABRA1/GABRA2/GABRA4/GABRA5/GABRA6/GABRB1/GABRB2/GABRB3/GABRD/GABRE/GABRG1/GABRG2/GABRR1/GLRA1/GLRA2/GLRA4/GLRB/GRIA1/GRIA2/GRIA4/GRID2/GRIK1/GRIK3/GRIN1/GRIN2A/GRIN2B/GRIN2C/GRIN2D/GRIN3B/HTR3A/HTR3B/HTR3D/HTR3E	46
GO:0022835	transmitter-gated channel activity	46/6686	61/17697	2.37682e-09	1.89037e-07	1.76802e-07	CHRNA1/CHRNA10/CHRNA2/CHRNA3/CHRNA4/CHRNA5/CHRNA7/CHRNA9/CHRNB1/CHRNB2/CHRNB4/CHRND/CHRNG/GABRA1/GABRA2/GABRA4/GABRA5/GABRA6/GABRB1/GABRB2/GABRB3/GABRD/GABRE/GABRG1/GABRG2/GABRR1/GLRA1/GLRA2/GLRA4/GLRB/GRIA1/GRIA2/GRIA4/GRID2/GRIK1/GRIK3/GRIN1/GRIN2A/GRIN2B/GRIN2C/GRIN2D/GRIN3B/HTR3A/HTR3B/HTR3D/HTR3E	46
GO:0022843	voltage-gated cation channel activity	87/6686	142/17697	1.08562e-08	8.09466e-07	7.57078e-07	CACHD1/CACNA1A/CACNA1B/CACNA1E/CACNA1F/CACNA1G/CACNA1H/CACNA1I/CACNA1S/CACNA2D2/CACNA2D4/CACNB2/CACNG1/CACNG2/CACNG3/CACNG4/CACNG5/CACNG6/CACNG7/CALHM1/CATSPER3/CATSPER4/CDK5/CNR1/GRIN1/GRIN2A/GRIN2B/GRIN2C/GRIN2D/HCN2/HCN3/HCN4/HTR1B/IL1RAPL1/ITGAV/KCNA1/KCNA10/KCNA4/KCNA6/KCNA7/KCNAB1/KCNB1/KCNC1/KCNC2/KCNC4/KCND2/KCND3/KCNE1/KCNF1/KCNG1/KCNG3/KCNG4/KCNH3/KCNH4/KCNH5/KCNH6/KCNH7/KCNH8/KCNIP2/KC…	87
GO:0005244	voltage-gated ion channel activity	110/6686	197/17697	1.79178e-07	1.18755e-05	1.11069e-05	CACHD1/CACNA1A/CACNA1B/CACNA1E/CACNA1F/CACNA1G/CACNA1H/CACNA1I/CACNA1S/CACNA2D2/CACNA2D4/CACNB2/CACNG1/CACNG2/CACNG3/CACNG4/CACNG5/CACNG6/CACNG7/CALHM1/CATSPER2/CATSPER3/CATSPER4/CDK5/CLCN1/CLCN3/CLIC5/CLIC6/CNR1/CYBB/GRIN1/GRIN2A/GRIN2B/GRIN2C/GRIN2D/HCN2/HCN3/HCN4/HTR1B/IL1RAPL1/ITGAV/KCNA1/KCNA10/KCNA4/KCNA6/KCNA7/KCNAB1/KCNB1/KCNC1/KCNC2/KCNC4/KCND2/KCND3/KCNE1/KCNF1/KCNG1/KCNG3/KCNG4/KCNH3/K…	110
GO:0022832	voltage-gated channel activity	110/6686	197/17697	1.79178e-07	1.18755e-05	1.11069e-05	CACHD1/CACNA1A/CACNA1B/CACNA1E/CACNA1F/CACNA1G/CACNA1H/CACNA1I/CACNA1S/CACNA2D2/CACNA2D4/CACNB2/CACNG1/CACNG2/CACNG3/CACNG4/CACNG5/CACNG6/CACNG7/CALHM1/CATSPER2/CATSPER3/CATSPER4/CDK5/CLCN1/CLCN3/CLIC5/CLIC6/CNR1/CYBB/GRIN1/GRIN2A/GRIN2B/GRIN2C/GRIN2D/HCN2/HCN3/HCN4/HTR1B/IL1RAPL1/ITGAV/KCNA1/KCNA10/KCNA4/KCNA6/KCNA7/KCNAB1/KCNB1/KCNC1/KCNC2/KCNC4/KCND2/KCND3/KCNE1/KCNF1/KCNG1/KCNG3/KCNG4/KCNH3/K…	110
GO:1904315	transmitter-gated ion channel activity involved in regulation of postsynaptic membrane potential	35/6686	47/17697	3.3866e-07	2.12643e-05	1.98881e-05	CHRNA1/CHRNA10/CHRNA2/CHRNA3/CHRNA4/CHRNA5/CHRNA7/CHRNA9/CHRNB1/CHRNB2/CHRNB4/CHRND/CHRNG/GABRA1/GABRA2/GABRA4/GABRA5/GABRA6/GABRB1/GABRB2/GABRB3/GABRD/GABRE/GABRG1/GABRG2/GABRR1/GLRA1/GLRA2/GLRB/GRIA1/GRID2/GRIK1/GRIK3/GRIN1/GRIN2C	35
GO:0099529	neurotransmitter receptor activity involved in regulation of postsynaptic membrane potential	36/6686	50/17697	9.1974e-07	5.48625e-05	5.13118e-05	CHRM1/CHRNA1/CHRNA10/CHRNA2/CHRNA3/CHRNA4/CHRNA5/CHRNA7/CHRNA9/CHRNB1/CHRNB2/CHRNB4/CHRND/CHRNG/GABRA1/GABRA2/GABRA4/GABRA5/GABRA6/GABRB1/GABRB2/GABRB3/GABRD/GABRE/GABRG1/GABRG2/GABRR1/GLRA1/GLRA2/GLRB/GRIA1/GRID2/GRIK1/GRIK3/GRIN1/GRIN2C	36
GO:0098960	postsynaptic neurotransmitter receptor activity	37/6686	52/17697	1.04506e-06	5.93691e-05	5.55268e-05	CHRM1/CHRNA1/CHRNA10/CHRNA2/CHRNA3/CHRNA4/CHRNA5/CHRNA7/CHRNA9/CHRNB1/CHRNB2/CHRNB4/CHRND/CHRNG/GABRA1/GABRA2/GABRA4/GABRA5/GABRA6/GABRB1/GABRB2/GABRB3/GABRD/GABRE/GABRG1/GABRG2/GABRR1/GLRA1/GLRA2/GLRB/GRIA1/GRID2/GRIK1/GRIK3/GRIN1/GRIN2C/GRM1	37
GO:0015276	ligand-gated ion channel activity	79/6686	138/17697	2.53714e-06	0.0001316	0.000123083	CFTR/CHRFAM7A/CHRNA1/CHRNA10/CHRNA2/CHRNA3/CHRNA4/CHRNA5/CHRNA7/CHRNA9/CHRNB1/CHRNB2/CHRNB4/CHRND/CHRNG/CNGA2/CNGA3/CNGA4/CNGB1/CNGB3/GABRA1/GABRA2/GABRA4/GABRA5/GABRA6/GABRB1/GABRB2/GABRB3/GABRD/GABRE/GABRG1/GABRG2/GABRQ/GABRR1/GABRR3/GLRA1/GLRA2/GLRA4/GLRB/GRIA1/GRIA2/GRIA4/GRID2/GRIK1/GRIK3/GRIN1/GRIN2A/GRIN2B/GRIN2C/GRIN2D/GRIN3B/HCN2/HCN4/HTR3A/HTR3B/HTR3D/HTR3E/JPH1/JPH3/KCNA10/KCNJ1/KCNJ11…	79
GO:0022834	ligand-gated channel activity	79/6686	138/17697	2.53714e-06	0.0001316	0.000123083	CFTR/CHRFAM7A/CHRNA1/CHRNA10/CHRNA2/CHRNA3/CHRNA4/CHRNA5/CHRNA7/CHRNA9/CHRNB1/CHRNB2/CHRNB4/CHRND/CHRNG/CNGA2/CNGA3/CNGA4/CNGB1/CNGB3/GABRA1/GABRA2/GABRA4/GABRA5/GABRA6/GABRB1/GABRB2/GABRB3/GABRD/GABRE/GABRG1/GABRG2/GABRQ/GABRR1/GABRR3/GLRA1/GLRA2/GLRA4/GLRB/GRIA1/GRIA2/GRIA4/GRID2/GRIK1/GRIK3/GRIN1/GRIN2A/GRIN2B/GRIN2C/GRIN2D/GRIN3B/HCN2/HCN4/HTR3A/HTR3B/HTR3D/HTR3E/JPH1/JPH3/KCNA10/KCNJ1/KCNJ11…	79
GO:0004993	G protein-coupled serotonin receptor activity	26/6686	34/17697	4.94055e-06	0.000235763	0.000220505	CHRM1/CHRM2/CHRM3/CHRM4/CHRM5/DRD4/HRH3/HTR1A/HTR1B/HTR1D/HTR1E/HTR2A/HTR2C/HTR4/HTR5A/HTR6/HTR7/OR10H1/OR10H3/OR10H4/OR10H5/OR10J5/OR11H4/OR5T2/OR5T3/OR6T1	26
GO:0099589	serotonin receptor activity	26/6686	34/17697	4.94055e-06	0.000235763	0.000220505	CHRM1/CHRM2/CHRM3/CHRM4/CHRM5/DRD4/HRH3/HTR1A/HTR1B/HTR1D/HTR1E/HTR2A/HTR2C/HTR4/HTR5A/HTR6/HTR7/OR10H1/OR10H3/OR10H4/OR10H5/OR10J5/OR11H4/OR5T2/OR5T3/OR6T1	26
GO:0042165	neurotransmitter binding	37/6686	55/17697	8.6456e-06	0.0003967	0.000371026	ACHE/CBS/CHKA/CHRFAM7A/CHRM3/CHRNA1/CHRNA2/CHRNA3/CHRNA4/CHRNA5/CHRNA7/CHRNB1/CHRNB2/CHRNB4/CHRND/CHRNG/CRHBP/CRHR1/CRP/GLRA1/GLRA2/GLRA4/GLRB/GNMT/GRIN1/GRIN2B/GRIN3B/HTR1A/HTR1B/HTR1E/HTR2A/HTR2C/HTR3A/HTR5A/SLC5A7/SLC6A12/SLC6A13	37
GO:0008188	neuropeptide receptor activity	34/6686	50/17697	1.40141e-05	0.000619215	0.000579139	BRS3/CYSLTR1/GALR1/GALR3/GPR139/GPR83/HCRTR2/KISS1R/MC2R/MCHR1/NMBR/NMUR1/NPBWR1/NPBWR2/NPFFR1/NPFFR2/NPSR1/NPY2R/NTSR1/NTSR2/OPRM1/PRLHR/PROKR1/PROKR2/QRFPR/RXFP3/RXFP4/SORCS1/SORCS2/SSTR1/SSTR3/SSTR4/SSTR5/TACR3	34
GO:0015370	solute:sodium symporter activity	45/6686	72/17697	1.79182e-05	0.000763444	0.000714035	SLC10A2/SLC12A1/SLC13A1/SLC13A2/SLC13A3/SLC13A4/SLC13A5/SLC17A2/SLC17A3/SLC17A4/SLC17A7/SLC18A1/SLC1A1/SLC1A6/SLC20A1/SLC20A2/SLC22A3/SLC23A1/SLC23A2/SLC28A1/SLC28A2/SLC28A3/SLC34A1/SLC34A3/SLC4A5/SLC4A8/SLC4A9/SLC5A11/SLC5A12/SLC5A2/SLC5A3/SLC5A7/SLC5A9/SLC6A12/SLC6A13/SLC6A16/SLC6A17/SLC6A18/SLC6A19/SLC6A2/SLC6A3/SLC6A5/SLC6A6/SLC6A7/SLC6A9	45
GO:0099528	G protein-coupled neurotransmitter receptor activity	29/6686	41/17697	1.8724e-05	0.000770266	0.000720414	CHRM1/CHRM2/CHRM3/CHRM4/CHRM5/DRD4/GPR156/GRM1/HRH3/HTR1A/HTR1B/HTR1D/HTR1E/HTR2A/HTR2C/HTR4/HTR5A/HTR6/HTR7/OPRM1/OR10H1/OR10H3/OR10H4/OR10H5/OR10J5/OR11H4/OR5T2/OR5T3/OR6T1	29
GO:0099095	ligand-gated anion channel activity	17/6686	20/17697	1.96023e-05	0.000779516	0.000729066	CFTR/GABRA1/GABRA2/GABRA4/GABRA5/GABRA6/GABRB1/GABRB2/GABRB3/GABRE/GABRG1/GABRG2/GLRA1/GLRA2/GLRA4/GLRB/SLC17A7	17
GO:0005249	voltage-gated potassium channel activity	52/6686	87/17697	2.53281e-05	0.000974722	0.000911638	HCN2/HCN3/HCN4/KCNA1/KCNA10/KCNA4/KCNA6/KCNA7/KCNAB1/KCNB1/KCNC1/KCNC2/KCNC4/KCND2/KCND3/KCNE1/KCNF1/KCNG1/KCNG3/KCNG4/KCNH3/KCNH4/KCNH5/KCNH6/KCNH7/KCNH8/KCNIP2/KCNJ1/KCNJ11/KCNJ12/KCNJ13/KCNJ14/KCNJ3/KCNJ4/KCNJ6/KCNJ9/KCNK18/KCNK2/KCNK6/KCNK9/KCNQ2/KCNQ3/KCNQ4/KCNQ5/KCNS1/KCNT1/KCNU1/KCNV1/KCNV2/LRRC38/LRRC52/LRRC55	52
GO:0005267	potassium channel activity	69/6686	123/17697	2.68655e-05	0.00100158	0.000936756	ABCC8/ABCC9/FXYD4/GRIK1/GRIK3/HCN2/HCN3/HCN4/HPN/KCNA1/KCNA10/KCNA4/KCNA6/KCNA7/KCNAB1/KCNB1/KCNC1/KCNC2/KCNC4/KCND2/KCND3/KCNE1/KCNF1/KCNG1/KCNG3/KCNG4/KCNH3/KCNH4/KCNH5/KCNH6/KCNH7/KCNH8/KCNIP2/KCNIP4/KCNJ1/KCNJ11/KCNJ12/KCNJ13/KCNJ14/KCNJ3/KCNJ4/KCNJ6/KCNJ9/KCNK10/KCNK13/KCNK15/KCNK16/KCNK18/KCNK2/KCNK4/KCNK6/KCNK9/KCNMB1/KCNMB2/KCNMB3/KCNN2/KCNQ2/KCNQ3/KCNQ4/KCNQ5/KCNS1/KCNT1/KCNU1/KCNV1/KCNV…	69
GO:0008527	taste receptor activity	22/6686	29/17697	3.38624e-05	0.00122418	0.00114495	PKD1L3/PKD2L1/TAS1R1/TAS1R2/TAS2R1/TAS2R10/TAS2R14/TAS2R16/TAS2R20/TAS2R3/TAS2R30/TAS2R31/TAS2R38/TAS2R39/TAS2R4/TAS2R40/TAS2R43/TAS2R5/TAS2R50/TAS2R60/TAS2R7/TAS2R8	22
GO:0015085	calcium ion transmembrane transporter activity	76/6686	139/17697	3.61669e-05	0.00126903	0.0011869	ATP2A1/ATP2B2/ATP2B3/ATP2B4/ATP2C1/ATP2C2/CACHD1/CACNA1A/CACNA1B/CACNA1E/CACNA1F/CACNA1G/CACNA1H/CACNA1I/CACNA1S/CACNA2D2/CACNA2D4/CACNB2/CACNG1/CACNG2/CACNG3/CACNG4/CACNG5/CACNG6/CACNG7/CALHM1/CATSPER2/CATSPER3/CATSPER4/CDK5/CHRNA10/CHRNA7/CHRNA9/CNR1/CUL5/FAM155A/GPM6A/GRIN1/GRIN2A/GRIN2B/GRIN2C/GRIN2D/GRIN3B/HTR1B/IL1RAPL1/ITGAV/JPH1/JPH3/MCOLN3/OPRM1/PANX1/PKD1L2/PKD1L3/PKD2L1/PKDREJ/RYR1/RYR…	76
GO:0005262	calcium channel activity	68/6686	123/17697	5.73339e-05	0.00195427	0.00182779	CACHD1/CACNA1A/CACNA1B/CACNA1E/CACNA1F/CACNA1G/CACNA1H/CACNA1I/CACNA1S/CACNA2D2/CACNA2D4/CACNB2/CACNG1/CACNG2/CACNG3/CACNG4/CACNG5/CACNG6/CACNG7/CALHM1/CATSPER2/CATSPER3/CATSPER4/CDK5/CHRNA10/CHRNA7/CHRNA9/CNR1/CUL5/FAM155A/GPM6A/GRIN1/GRIN2A/GRIN2B/GRIN2C/GRIN2D/GRIN3B/HTR1B/IL1RAPL1/ITGAV/JPH1/JPH3/MCOLN3/OPRM1/PANX1/PKD1L2/PKD1L3/PKD2L1/PKDREJ/RYR1/RYR3/SEC61A1/SLC24A1/SLC24A2/SLC24A4/SLC24A5/…	68
GO:0015294	solute:cation symporter activity	58/6686	102/17697	6.80991e-05	0.00219889	0.00205658	SLC10A2/SLC11A2/SLC12A1/SLC12A5/SLC13A1/SLC13A2/SLC13A3/SLC13A4/SLC13A5/SLC15A1/SLC15A2/SLC15A5/SLC17A2/SLC17A3/SLC17A4/SLC17A5/SLC17A7/SLC18A1/SLC1A1/SLC1A6/SLC20A1/SLC20A2/SLC22A3/SLC23A1/SLC23A2/SLC25A3/SLC28A1/SLC28A2/SLC28A3/SLC2A10/SLC2A12/SLC32A1/SLC34A1/SLC34A3/SLC36A2/SLC36A3/SLC45A2/SLC4A5/SLC4A8/SLC4A9/SLC5A11/SLC5A12/SLC5A2/SLC5A3/SLC5A7/SLC5A9/SLC6A12/SLC6A13/SLC6A16/SLC6A17/SLC6A18/…	58
GO:0015077	monovalent inorganic cation transmembrane transporter activity	181/6686	382/17697	6.8197e-05	0.00219889	0.00205658	ABCC8/ABCC9/ATP1A2/ATP1A3/ATP1B3/ATP1B4/ATP2A1/ATP2C1/ATP2C2/ATP4A/ATP6V0A4/ATP6V0D1/ATP6V0D2/ATP6V1A/ATP6V1B1/ATP6V1D/ATP6V1E1/ATP6V1E2/ATP6V1F/ATP6V1G2/CLCN3/CNNM4/COX10/COX4I1/COX4I2/COX6B1/COX7C/COX8A/FXYD2/FXYD4/GRIK1/GRIK3/HCN2/HCN3/HCN4/HPN/KCNA1/KCNA10/KCNA4/KCNA6/KCNA7/KCNAB1/KCNB1/KCNC1/KCNC2/KCNC4/KCND2/KCND3/KCNE1/KCNF1/KCNG1/KCNG3/KCNG4/KCNH3/KCNH4/KCNH5/KCNH6/KCNH7/KCNH8/KCNIP2/KCNI…	181
GO:0070405	ammonium ion binding	45/6686	75/17697	7.64859e-05	0.00240126	0.00224585	ACHE/AMD1/APOA5/CHKA/CHRFAM7A/CHRM3/CHRNA1/CHRNA2/CHRNA3/CHRNA4/CHRNA5/CHRNA7/CHRNB1/CHRNB2/CHRNB4/CHRND/CHRNG/CRP/DRD2/DRD3/DRD4/DRD5/GPR119/GPR12/HTR1A/HTR1B/HTR1E/HTR2A/HTR2C/HTR3A/HTR5A/IGHM/NF1/OR13F1/OR56A1/OR56A4/OR5T1/PCYT1B/PLTP/SAT1/SATL1/SCARB2/SLC5A7/SLC6A3/TH	45
GO:0015464	acetylcholine receptor activity	18/6686	23/17697	9.02283e-05	0.00269106	0.0025169	CHRFAM7A/CHRM1/CHRM2/CHRM3/CHRM4/CHRM5/CHRNA1/CHRNA2/CHRNA3/CHRNA4/CHRNA5/CHRNA7/CHRNB1/CHRNB2/CHRNB4/CHRND/CHRNG/HRH3	18
GO:0033038	bitter taste receptor activity	18/6686	23/17697	9.02283e-05	0.00269106	0.0025169	TAS2R1/TAS2R10/TAS2R14/TAS2R16/TAS2R20/TAS2R3/TAS2R30/TAS2R31/TAS2R38/TAS2R39/TAS2R4/TAS2R40/TAS2R43/TAS2R5/TAS2R50/TAS2R60/TAS2R7/TAS2R8	18
GO:0015079	potassium ion transmembrane transporter activity	83/6686	159/17697	0.000142427	0.00414428	0.00387606	ABCC8/ABCC9/ATP1A2/ATP1A3/ATP1B3/ATP4A/FXYD2/FXYD4/GRIK1/GRIK3/HCN2/HCN3/HCN4/HPN/KCNA1/KCNA10/KCNA4/KCNA6/KCNA7/KCNAB1/KCNB1/KCNC1/KCNC2/KCNC4/KCND2/KCND3/KCNE1/KCNF1/KCNG1/KCNG3/KCNG4/KCNH3/KCNH4/KCNH5/KCNH6/KCNH7/KCNH8/KCNIP2/KCNIP4/KCNJ1/KCNJ11/KCNJ12/KCNJ13/KCNJ14/KCNJ3/KCNJ4/KCNJ6/KCNJ9/KCNK10/KCNK13/KCNK15/KCNK16/KCNK18/KCNK2/KCNK4/KCNK6/KCNK9/KCNMB1/KCNMB2/KCNMB3/KCNN2/KCNQ2/KCNQ3/KCNQ4/K…	83
GO:0015293	symporter activity	76/6686	144/17697	0.000169364	0.00481076	0.00449941	SLC10A2/SLC10A7/SLC11A2/SLC12A1/SLC12A5/SLC13A1/SLC13A2/SLC13A3/SLC13A4/SLC13A5/SLC15A1/SLC15A2/SLC15A5/SLC16A1/SLC16A12/SLC16A9/SLC17A1/SLC17A2/SLC17A3/SLC17A4/SLC17A5/SLC17A6/SLC17A7/SLC18A1/SLC1A1/SLC1A5/SLC1A6/SLC1A7/SLC20A1/SLC20A2/SLC22A3/SLC22A4/SLC23A1/SLC23A2/SLC24A1/SLC24A2/SLC24A4/SLC24A5/SLC25A18/SLC25A22/SLC25A3/SLC28A1/SLC28A2/SLC28A3/SLC2A10/SLC2A12/SLC32A1/SLC34A1/SLC34A3/SLC36A2/…	76
GO:0005231	excitatory extracellular ligand-gated ion channel activity	22/6686	31/17697	0.000180586	0.00501022	0.00468596	CHRNA1/CHRNA10/CHRNA2/CHRNA3/CHRNA4/CHRNA5/CHRNA7/CHRNA9/CHRNB1/CHRNB2/CHRNB4/CHRND/CHRNG/GLRA1/GLRA2/GLRA4/GLRB/P2RX1/P2RX2/P2RX3/P2RX6/SLC17A7	22
GO:0015081	sodium ion transmembrane transporter activity	78/6686	149/17697	0.00019768	0.00535982	0.00501294	ATP1A2/ATP1A3/ATP1B3/ATP4A/CNNM4/FXYD2/GRIK1/GRIK3/HCN2/HCN3/HCN4/PKD2L1/SCN10A/SCN11A/SCN1A/SCN1B/SCN2B/SCN3A/SCN3B/SCN4A/SCN5A/SCN7A/SCN8A/SLC10A2/SLC12A1/SLC13A1/SLC13A2/SLC13A3/SLC13A4/SLC13A5/SLC17A2/SLC17A3/SLC17A4/SLC17A7/SLC18A1/SLC1A1/SLC1A6/SLC20A1/SLC20A2/SLC22A3/SLC23A1/SLC23A2/SLC24A1/SLC24A2/SLC24A4/SLC24A5/SLC28A1/SLC28A2/SLC28A3/SLC34A1/SLC34A3/SLC4A11/SLC4A5/SLC4A8/SLC4A9/SLC5A11…	78
GO:0005132	type I interferon receptor binding	14/6686	17/17697	0.000222169	0.00576191	0.005389	IFNA10/IFNA13/IFNA14/IFNA16/IFNA17/IFNA2/IFNA21/IFNA4/IFNA5/IFNA6/IFNA7/IFNA8/IFNB1/IFNW1	14
GO:0042166	acetylcholine binding	14/6686	17/17697	0.000222169	0.00576191	0.005389	ACHE/CHRFAM7A/CHRM3/CHRNA1/CHRNA2/CHRNA3/CHRNA4/CHRNA5/CHRNA7/CHRNB1/CHRNB2/CHRNB4/CHRND/CHRNG	14
GO:0004890	GABA-A receptor activity	15/6686	19/17697	0.000307595	0.00780767	0.00730236	GABRA1/GABRA2/GABRA4/GABRA5/GABRA6/GABRB1/GABRB2/GABRB3/GABRD/GABRE/GABRG1/GABRG2/GABRQ/GABRR1/GABRR3	15
GO:0005245	voltage-gated calcium channel activity	30/6686	48/17697	0.000441313	0.0108204	0.0101201	CACHD1/CACNA1A/CACNA1B/CACNA1E/CACNA1F/CACNA1G/CACNA1H/CACNA1I/CACNA1S/CACNA2D2/CACNA2D4/CACNB2/CACNG1/CACNG2/CACNG3/CACNG4/CACNG5/CACNG6/CACNG7/CALHM1/CATSPER3/CATSPER4/CDK5/CNR1/HTR1B/IL1RAPL1/ITGAV/OPRM1/RYR1/TMC2	30
GO:1990939	ATP-dependent microtubule motor activity	28/6686	44/17697	0.000444426	0.0108204	0.0101201	DNAH1/DNAH10/DNAH11/DNAH14/DNAH2/DNAH3/DNAH5/DNAH6/DNAH7/DNAH8/DNAH9/DNAI1/DNAI2/DNAL4/DYNC1I1/DYNC2H1/DYNC2LI1/DYNLL1/KIF17/KIF19/KIF1A/KIF25/KIF3A/KIF3B/KIF5A/KIF5C/WDR63/WDR78	28
GO:0005237	inhibitory extracellular ligand-gated ion channel activity	13/6686	16/17697	0.000489098	0.0114411	0.0107006	GABRA1/GABRA2/GABRA4/GABRA5/GABRA6/GABRB2/GABRE/GABRG1/GABRG2/GLRA1/GLRA2/GLRA4/GLRB	13
GO:0022848	acetylcholine-gated cation-selective channel activity	13/6686	16/17697	0.000489098	0.0114411	0.0107006	CHRNA1/CHRNA10/CHRNA2/CHRNA3/CHRNA4/CHRNA5/CHRNA7/CHRNA9/CHRNB1/CHRNB2/CHRNB4/CHRND/CHRNG	13
GO:0045503	dynein light chain binding	18/6686	25/17697	0.000537868	0.0123399	0.0115413	DNAH1/DNAH10/DNAH11/DNAH14/DNAH2/DNAH3/DNAH5/DNAH6/DNAH7/DNAH8/DNAH9/DNAI1/DNAI2/DYNC1I1/DYNC2H1/GLUL/WDR63/WDR78	18
GO:0042562	hormone binding	55/6686	102/17697	0.000646698	0.0143678	0.013438	ACHE/ADCYAP1R1/ADIPOR1/ALDH1A3/AR/ATP1A2/ATP1A3/CALCR/CALCRL/CCKAR/CCKBR/CHRFAM7A/CHRM3/CHRNA1/CHRNA2/CHRNA3/CHRNA4/CHRNA5/CHRNA7/CHRNB1/CHRNB2/CHRNB4/CHRND/CHRNG/CRHBP/CRHR1/CRHR2/EGFR/GALR1/GALR3/GCGR/GHR/GHRHR/GHSR/GIPR/HCRTR1/HCRTR2/HSD17B1/LEPR/LHCGR/MC3R/MC5R/MCHR1/MLNR/NR3C1/PIK3R1/PRLR/RXFP2/SEC61B/SHBG/SULT2B1/THRB/TSPO/VIPR1/VIPR2	55
GO:0008569	ATP-dependent microtubule motor activity, minus-end-directed	14/6686	18/17697	0.000650347	0.0143678	0.013438	DNAH1/DNAH10/DNAH11/DNAH14/DNAH2/DNAH3/DNAH5/DNAH6/DNAH7/DNAH8/DNAH9/DYNC2H1/DYNC2LI1/KIF25	14
GO:0022851	GABA-gated chloride ion channel activity	11/6686	13/17697	0.000744462	0.0161481	0.015103	GABRA1/GABRA2/GABRA4/GABRA5/GABRA6/GABRB1/GABRB2/GABRB3/GABRE/GABRG1/GABRG2	11
GO:0016917	GABA receptor activity	16/6686	22/17697	0.000930125	0.019815	0.0185326	GABRA1/GABRA2/GABRA4/GABRA5/GABRA6/GABRB1/GABRB2/GABRB3/GABRD/GABRE/GABRG1/GABRG2/GABRQ/GABRR1/GABRR3/GPR156	16
GO:0017080	sodium channel regulator activity	23/6686	36/17697	0.00132027	0.0276247	0.0258368	ATP2B4/CAMK2D/CAV3/FGF12/FXYD1/FXYD2/FXYD4/FXYD6/GPD1L/GPLD1/NEDD4L/NOS1/PCSK9/PKP2/RSC1A1/SCLT1/SCN1B/SCN2B/SCN3B/SGK2/SNTA1/TMPRSS3/YWHAH	23
GO:0004935	adrenergic receptor activity	13/6686	17/17697	0.00135662	0.0276247	0.0258368	ADRA1A/ADRA1B/ADRA1D/ADRA2A/ADRA2B/ADRB3/DRD2/DRD3/GPR101/OR13F1/OR56A1/OR56A4/OR5T1	13
GO:0001653	peptide receptor activity	76/6686	152/17697	0.00136618	0.0276247	0.0258368	ADCYAP1R1/AGTR2/AVPR1B/BDKRB2/BRS3/CALCR/CALCRL/CCKAR/CCKBR/CCR4/CCR8/CCR9/CMKLR1/CRHR1/CRHR2/CX3CR1/CXCR3/CYSLTR1/F2R/FPR3/FSHR/GALR1/GALR3/GCGR/GHRHR/GIPR/GP1BA/GPR139/GPR32/GPR37L1/GPR75/GPR83/GUCY2C/GUCY2F/HCRTR1/HCRTR2/KISS1R/LHCGR/MAS1/MC2R/MC3R/MC5R/MCHR1/MCHR2/MLNR/NMBR/NMUR1/NPBWR1/NPBWR2/NPFFR1/NPFFR2/NPSR1/NPY2R/NTSR1/NTSR2/OGFRL1/OPRD1/OPRK1/OPRM1/PRLHR/PROKR1/PROKR2/QRFPR/RXFP2/RXFP3…	76
GO:0099094	ligand-gated cation channel activity	55/6686	105/17697	0.00158991	0.0316127	0.0295668	CHRNA1/CHRNA10/CHRNA2/CHRNA3/CHRNA4/CHRNA5/CHRNA7/CHRNA9/CHRNB1/CHRNB2/CHRNB4/CHRND/CHRNG/CNGA2/CNGA3/CNGA4/CNGB1/CNGB3/GRIA1/GRIA2/GRIA4/GRIK1/GRIK3/GRIN1/GRIN2A/GRIN2B/GRIN2C/GRIN2D/HCN2/HCN4/HTR3A/HTR3B/HTR3D/HTR3E/JPH1/JPH3/KCNA10/KCNJ1/KCNJ11/KCNJ12/KCNJ13/KCNJ14/KCNJ3/KCNJ4/KCNJ6/KCNJ9/KCNK6/MCOLN3/P2RX1/P2RX2/P2RX3/P2RX6/RYR1/RYR3/TRPA1	55
GO:0016247	channel regulator activity	72/6686	144/17697	0.00179795	0.0349898	0.0327253	ABCC9/AKAP9/AMBP/AMIGO1/ATP2B4/BCL2/CABP2/CABP4/CACNG1/CACNG2/CACNG3/CACNG4/CACNG5/CACNG6/CACNG7/CALM1/CALM2/CAMK2D/CAV3/CFTR/CHRNA7/CNIH3/CRISP1/DRD4/FGF12/FXYD1/FXYD2/FXYD4/FXYD6/GPD1L/GPLD1/GRM3/HPCAL4/KCNAB1/KCNE1/KCNIP2/KCNIP4/KCNMB1/KCNMB2/KCNMB3/KCNS1/KCNV1/LRRC38/LRRC52/LRRC55/NEDD4L/NOS1/NPY/NPY2R/NRXN1/NRXN2/PCSK9/PDZD3/PHPT1/PKP2/REM2/RRAD/RSC1A1/SCLT1/SCN1B/SCN2B/SCN3B/SGK2/SNTA1/SRI/…	72
GO:0005326	neurotransmitter transporter activity	30/6686	51/17697	0.00181841	0.0349898	0.0327253	CPLX1/CPLX3/GABRQ/SLC17A6/SLC17A7/SLC18A1/SLC18A3/SLC1A1/SLC1A6/SLC1A7/SLC25A18/SLC25A22/SLC25A38/SLC32A1/SLC36A2/SLC36A3/SLC44A4/SLC5A7/SLC6A12/SLC6A13/SLC6A16/SLC6A17/SLC6A18/SLC6A19/SLC6A2/SLC6A3/SLC6A5/SLC6A6/SLC6A7/SLC6A9	30
GO:0005104	fibroblast growth factor receptor binding	17/6686	25/17697	0.00210978	0.0399518	0.0373662	FGF10/FGF17/FGF19/FGF20/FGF21/FGF23/FGF3/FGF4/FGF5/FGF7/FGF8/FGF9/FLRT1/FLRT2/FLRT3/FRS2/KLB	17
GO:0031432	titin binding	11/6686	14/17697	0.00228128	0.0425245	0.0397723	ACTN2/ANKRD1/ANKRD23/CALM1/CALM2/CAMK2D/CAPN3/MYBPC1/MYBPC3/OBSCN/TRIM63	11

## Sheet: Turquoise_KEGG
ID	Description	GeneRatio	BgRatio	pvalue	p.adjust	qvalue	geneID	Count
hsa04740	Olfactory transduction	359/2993	448/7946	5.56099e-80	1.79064e-77	1.77952e-77	CALM1/CALM2/CALML4/CALML5/CALML6/CAMK2A/CAMK2B/CAMK2D/CNGA2/CNGA3/CNGA4/CNGB1/GNAL/GNG13/NCALD/OR10A3/OR10A4/OR10A6/OR10A7/OR10AD1/OR10AG1/OR10C1/OR10G2/OR10G3/OR10G4/OR10G7/OR10G8/OR10G9/OR10H1/OR10H3/OR10H4/OR10H5/OR10J1/OR10J5/OR10K1/OR10K2/OR10P1/OR10Q1/OR10R2/OR10S1/OR10T2/OR10V1/OR10W1/OR10X1/OR10Z1/OR11A1/OR11G2/OR11H1/OR11H12/OR11H2/OR11H4/OR11H6/OR11L1/OR12D2/OR12D3/OR13A1/OR13C2/OR13C3/…	359
hsa05168	Herpes simplex virus 1 infection	291/2993	491/7946	1.1508e-23	1.85279e-21	1.84128e-21	BAX/BCL2/BID/C5/CASP3/CASP8/CCL2/CD74/CHUK/CYCS/DDX58/EIF2AK2/EIF2AK3/FAS/HLA-A/HLA-C/HLA-DMA/HLA-DMB/HLA-DPA1/HLA-DPB1/HLA-DRA/IFNA10/IFNA13/IFNA14/IFNA16/IFNA17/IFNA2/IFNA21/IFNA4/IFNA5/IFNA6/IFNA7/IFNA8/IFNB1/IFNGR1/IL12B/IRAK4/LTA/MAP3K7/MYD88/NXF2/NXF5/PIK3R1/PILRA/PPP1CA/SOCS3/SP100/SRPK1/SRSF1/SRSF5/SRSF6/SRSF8/SRSF9/TLR2/TLR3/TLR9/TRAF3/TRAF5/TRAF6/ZFP1/ZFP14/ZFP30/ZFP37/ZFP82/ZFP90/ZIK1/…	291
hsa04080	Neuroactive ligand-receptor interaction	203/2993	340/7946	3.38211e-17	3.63013e-15	3.60758e-15	ADCYAP1/ADCYAP1R1/ADM/ADORA1/ADORA2B/ADRA1A/ADRA1B/ADRA1D/ADRA2A/ADRA2B/ADRB3/AGT/AGTR2/AVP/AVPR1B/BDKRB2/BRS3/C5/CALCA/CALCB/CALCR/CALCRL/CCKAR/CCKBR/CGA/CHRM1/CHRM2/CHRM3/CHRM4/CHRM5/CHRNA1/CHRNA10/CHRNA2/CHRNA3/CHRNA4/CHRNA5/CHRNA7/CHRNA9/CHRNB1/CHRNB2/CHRNB4/CHRND/CHRNG/CNR1/CORT/CRH/CRHR1/CRHR2/CSH1/CSH2/CTSG/CYSLTR1/DRD2/DRD3/DRD4/DRD5/EDN3/F2/F2R/FPR3/FSHB/FSHR/GABRA1/GABRA2/GABRA4/GABRA5/…	203
hsa05033	Nicotine addiction	32/2993	40/7946	5.11353e-08	4.11639e-06	4.09082e-06	CACNA1A/CACNA1B/CHRNA4/CHRNA7/CHRNB2/GABRA1/GABRA2/GABRA4/GABRA5/GABRA6/GABRB1/GABRB2/GABRB3/GABRD/GABRE/GABRG1/GABRG2/GABRQ/GABRR1/GABRR3/GRIA1/GRIA2/GRIA4/GRIN1/GRIN2A/GRIN2B/GRIN2C/GRIN2D/GRIN3B/SLC17A6/SLC17A7/SLC32A1	32
hsa04742	Taste transduction	50/2993	83/7946	2.31424e-05	0.00149037	0.00148111	ADCY8/CACNA1A/CALHM1/CHRM3/GABRA1/GABRA2/GABRA4/GABRA5/GABRA6/GNG13/GRM1/GRM4/HCN4/HTR1A/HTR1B/HTR1D/HTR1E/HTR3A/HTR3B/HTR3D/HTR3E/P2RX2/P2RX3/P2RY1/P2RY4/PKD1L3/PKD2L1/PRKACG/SCN3A/TAS1R1/TAS1R2/TAS2R1/TAS2R10/TAS2R14/TAS2R16/TAS2R20/TAS2R3/TAS2R30/TAS2R31/TAS2R38/TAS2R39/TAS2R4/TAS2R40/TAS2R41/TAS2R43/TAS2R5/TAS2R50/TAS2R60/TAS2R7/TAS2R8	50
hsa04744	Phototransduction	20/2993	28/7946	0.000293369	0.0157442	0.0156464	CALM1/CALM2/CALML4/CALML5/CALML6/CNGB1/GNAT1/GRK1/GRK7/GUCA1B/GUCA1C/GUCY2F/PDE6A/PDE6B/PDE6G/RCVRN/RGS9/RHO/SAG/SLC24A1	20
hsa04950	Maturity onset diabetes of the young	18/2993	26/7946	0.00107512	0.0494557	0.0491485	FOXA2/GCK/HHEX/HNF1A/HNF1B/HNF4A/INS/MAFA/NEUROD1/NEUROG3/NKX2-2/NKX6-1/ONECUT1/PAX4/PDX1/PKLR/RFX6/SLC2A2	18
